# Supplementary material
Source: PubMed Central journal article supplement (PMC2614739)
Supplement: 0810634105_ST1_PDF.pdf [file 0810634105_ST1_PDF.pdf]

Table S1. PCR primers used in this study

**A**

| <b>Locus</b> | <b>ID</b> | <b>Sequence</b>                    |
|--------------|-----------|------------------------------------|
| TFF1         | a         | AGAGGGGCCAGTGGGAATAAAGT            |
|              | b         | ACTGCCTCGAGATGTCTTTGGAGAAA         |
|              | c         | GGCTTTGACTCCCAGAGCATGGAT           |
|              | d         | AGGGCAGGCTCTGTTTGCTTAAAGA          |
|              | e         | GGAGGAGTTTGGGAGGAAGTGGAT           |
|              | f         | GCTGTTCTCCACGATGAAGACAAGGT         |
| TFF1         | g         | CCAGGGTTTCTCAGTGTGCCCTGAAGC        |
|              | h         | AGCAAGACCAGGGTTGCATTTAAGGGACCT     |
|              | TFF1e     | GGTAGCCCGCGCAGAGCA                 |
|              | A         | TGGCAGCCAAGCCCTTTTATTGT            |
|              | B         | ACACTGCAAATATTGCCGGTGGAT           |
|              | C         | GTTGCTCATGCTTGGGTTAAAAAAGGT        |
|              | D         | TGTGTGTACAAACCAATTTGAGACAACA       |
|              | E         | TTGGCTTTGCGGACAATAAACTG            |
|              | F         | TGAGACCCTTACACGAGGCGGTTT           |
|              | G         | GGTTTTGTCTTTAGAAACCATCGAAATCTTAACT |
|              | H         | CCCTACTTTAGCTGGTGACCAGAGAAGAA      |
|              | I         | GCATCTGCTGCCCTCTAAGAACGA           |
|              | J         | CGTATGCCAGACAGGTACCCTCTGACT        |
|              | K         | GCTTCTCAACGGGAGGAGGCATT            |

**B**

| <b>Locus</b> | <b>ID</b> | <b>Sequence</b>                 |
|--------------|-----------|---------------------------------|
| GREB1p/e     | 1         | CATGAGGTAGTGACAAGCTCTGTCTTTCC   |
|              | 2         | GCAGCTTCTGTCTCCTACTGAGACAGACTTT |
|              | 3         | CTCTCCGGGCAAAGTTAAATTCAGAAG     |
|              | 4         | TTTCCCTGTAAAATGCAAACACTACCTTGT  |
|              | 5         | AGGGAGGCCGGGCAGGAA              |
| GREB1p/TFF1e | 1         | GGTAGCCCGCGCAGAGCAT             |
|              | 2         | CCACCGTACTGCCCCTGTGGTT          |
|              | 3         | TTTTCCGGGAGCAACTCAAGATC         |
|              | 4         | CAAGAACACTGTTTCCACTGCGCTAGT     |

**C**

| <b>BAC Clones</b> |
|-------------------|
| RP11-884L15       |
| RP11-978017       |
| CTD-3017F4        |
| CTD-2337B13       |
| CTD-2533G12       |
| CTD-2653B11       |
| CTD-2563M14       |

(A) List of primer sequences used for 3C validation of intrachromosomal interactions. (B) List of primer sequences used for 3C validation of interchromosomal interactions. (C) BAC clones used in 3C controls.
