# Supplementary material
Source: PubMed Central journal article supplement (PMC2614739)
Supplement: 0810634105_ST2_PDF.pdf [file 0810634105_ST2_PDF.pdf]

Table S2. DNA and RNA probes used for FISH in this study

**A**

|   | <b>Locus</b> | <b>50mer Probe</b>                                 | <b>Chr.</b> |
|---|--------------|----------------------------------------------------|-------------|
| 1 | TFF1_e       | CTCTCCTGACTGCTGCCTCTCATCCCTGGCTCCCAGCGAGGTTCCAGCCC | 21          |
| 2 | GREB1_e1     | GAGCTGACCTTGTGGTAGGCACGGGCATGACTGGGCTGGGTGCCCGTTTT | 2           |
| 3 | GREB1_p1.1   | GGGGACTTCAAAGACGATGATGAAGTGCACCTTCACCAGAACCTGCATGT | 2           |

  

**B**

**RNA:DNA FISH Probes**

**DNA Target Probes**

|   |       |                                                                                              |
|---|-------|----------------------------------------------------------------------------------------------|
| A | TFF1  | <span style="color: green;">/56FAM/</span> GTTGATCCATTCTGCAGGTAAGGAGTTGAGATGCAAACACTTCCCAAGG |
| B | GREB1 | <span style="color: red;">/5Bio/</span> GTCAATGCCATTCCTTGCAGATCCACTCTCCCCTAAGAACTGTTCTGG     |

  

**RNA Target Probes**

|   |              |                                                                                               |
|---|--------------|-----------------------------------------------------------------------------------------------|
| C | TFF1 1-2 50  | <span style="color: red;">/5Bio/</span> TCACGGGGGGCCACTGTACACGTCTGTCTGGCCTCGGCCAGGGTGCC       |
| D | TFF1 2-3 50  | <span style="color: red;">/5Bio/</span> AGAAGTGTCTAAAATTCACACTCCTTCTGGAGGGACGTCGATGGTATT      |
| E | GREB1 1-2 50 | <span style="color: green;">/56FAM/</span> CTTACAAAAAGCTGGTCACTTCAGGGGGTGGCTGTCCTCAGCTGCAGCTA |
| F | GREB1 2-3 50 | <span style="color: green;">/56FAM/</span> TCCTCATTGTCCACTCGGCTACCACCTTCTAGAGCGGCAAGCTGCTGCTC |

(A) List of oligonucleotide probes for FISH. (B) List of probes designed for simultaneous RNA:DNA FISH. The moiety at 5' end of each probe is indicated in color. Also note that the RNA probes are designed against specific exon/exon junctions to minimize the cross-hybridization with the corresponding DNA sequences.
