# Supplementary material
Source: PubMed Central journal article supplement (PMC2614739)
Supplement: 0810634105_ST3_PDF.pdf [file 0810634105_ST3_PDF.pdf]

Table S3. List of antibodies used in this study

|    | <b>Antibody</b>                     | <b>Source</b>         |
|----|-------------------------------------|-----------------------|
| 1  | Qdot 525 Streptavidin Conjugate     | Invitrogen            |
| 2  | Qdot 655 anti-Fluorescein Conjugate | Invitrogen            |
| 3  | Texas Red <sup>®</sup> -X           | Invitrogen            |
| 4  | SC35                                | Fu and Maniatis, 1990 |
| 5  | Nuclear actin 2G2                   | Progen                |
| 6  | Alexa Fluor <sup>®</sup> 594        | Invitrogen            |
| 7  | Anti-Myosin I beta (Nuclear)        | Sigma                 |
| 8  | Human DLC1                          | Abcam                 |
| 9  | ARP2                                | Santa Cruz            |
| 10 | ARP3                                | Santa Cruz            |
| 11 | ARP2/3 Complex (p34-ARC)            | Santa Cruz            |
| 12 | BAF53                               | Santa Cruz            |
| 13 | BAF155                              | Santa Cruz            |
| 14 | BAF170                              | Santa Cruz            |
| 15 | BAF250                              | Santa Cruz            |
| 16 | FoxA1                               | Santa Cruz            |
| 17 | ESR1 (F-10)                         | Santa Cruz            |
| 18 | ESR1 (H-184)                        | Santa Cruz            |
| 19 | LSD1                                | Abcam                 |

Specific antibodies and their commercial sources are indicated.
